# Supplementary material for: Longitudinal effects of aerobic training programme on body composition in non-elite adolescent female swimmers
Source: PeerJ. 2025 May 19;13:e19456. doi: 10.7717/peerj.19456 (PMC12097237; doi:10.7717/peerj.19456)
Supplement: Supplemental Information 1 — Data from the swimming and control groups obtained during the experiment. [file peerj-13-19456-s001.xlsx]

## Sheet: Arkusz1
			Skinfold thickness indices						Skinfold thickness indices						Skinfold thickness indices						Skinfold thickness indices						Biological age						% body fat						Aerobic capacity index
Number of pearson	Sex	Group	shoulder blade (mm) 1	shoulder blade (mm) 2	shoulder blade (mm) 3	shoulder blade (mm) 4	shoulder blade (mm) 5	shoulder blade (mm) 6	stomach (mm) 1	stomach (mm) 2	stomach (mm) 3	stomach (mm) 4	stomach (mm) 5	stomach (mm) 6	biceps (mm) 1	biceps (mm) 2	biceps (mm) 3	biceps (mm) 4	biceps (mm) 5	biceps (mm) 6	triceps (mm) 1	triceps (mm) 2	triceps (mm) 3	triceps (mm) 4	triceps (mm) 5	triceps (mm) 6	biol. age (years) 1	biol. age (years) 2	biol. age (years) 3	biol. age (years) 4	biol. age (years) 5	biol. age (years) 6	% FAT 1	% FAT 2	% FAT 3	% FAT 4	% FAT 5	% FAT 6	VO2max (ml*kg*min) 1	VO2max (ml*kg*min) 2	VO2max (ml*kg*min) 3	VO2max (ml*kg*min) 4	VO2max (ml*kg*min) 5	VO2max (ml*kg*min) 6
1	Female	Experimental	6.1	6.6	7.1	7.8	7.9	7.4	9.1	11.1	12.4	13.2	12.1	10.6	4.6	5.3	4.4	4.9	4.8	3.5	9.9	10.5	9.5	9.1	9.2	8.5	11.0603	11.6783	12.5147	14.2543	14.8977	16.3733	15.452	16.4417	15.9957	16.2641	16.4417	15.3605	43.898	44.573	44.573	42.861	45.4016	46.3838
2	Female	Experimental	12.5	12.1	11.2	10.5	9.8	7.9	19.9	18.4	17.5	16.7	15.3	14.6	9.2	8.9	8.5	8.1	8.4	7.3	19.5	17.9	16.8	16.1	16.2	14.9	10.8853	11.373	11.725	12.3737	13.151	14.3587	26.748	25.7	24.548	23.6797	23.292	21.0661	41.511	39.6454	42.1092	40.3204	45.4016	43.7664
3	Female	Experimental	5	5.1	4.4	4.2	4.1	4.3	5.3	5.2	5.4	5.1	5.5	4.2	4.1	4.6	4	3.8	3.8	3.1	10.6	10.5	10	9.4	9.5	9.9	10.973	11.446	11.855	12.4297	13.136	14.8093	15.0843	15.0843	13.9563	13.1835	13.1835	13.7647	51.059	44.573	44.573	45.4016	50.4828	49.0012
4	Female	Experimental	9.8	7.3	5.4	4.2	4.1	9.1	8.5	8.6	8	7.5	6.9	9.9	5.8	5.5	5.6	5.2	5.3	3.8	5.5	11.9	15.5	16.2	15.9	14.1	10.016	10.368	10.8697	11.4033	11.8157	12.9777	14.8058	18.2437	19.6185	19.2219	18.9	21.3589	46.285	51.059	49.5006	51.1902	50.4828	47.9422
5	Female	Experimental	5.4	5.4	5.5	5.2	5	4.7	6.7	9.3	11	11.4	11.1	10.2	6.6	6.1	5.1	4.8	4.9	3.4	5.8	9.8	14.5	14.9	14.4	12.5	10.6047	11.1787	11.516	12.285	13.0547	14.6813	10.7653	14.7125	18.9	18.9809	18.4093	16.5301	53.446	51.9644	51.9644	50.4828	50.4828	51.6186
6	Female	Experimental	4.6	4.8	4.9	4.6	4.8	4	6.8	8.2	9	9.2	8.8	8.5	4.4	4.9	5.4	4.8	4.3	3.3	13.2	15.1	16.5	15.6	14.1	11.2	10.0313	10.6797	11.074	11.6343	12.4607	13.5197	17.0551	18.8189	20.0085	19.0615	17.9933	14.7125	53.446	53.446	51.9644	53.7308	53.0234	53.0234
7	Female	Experimental	10	9.4	7	13.4	7.7	5.3	12.4	11	9.2	8.9	8.3	12	11.9	7.7	6.2	6.9	7.5	6.4	15.9	14.6	12.8	11.4	11.2	12.8	10.5057	10.942	11.2843	11.6757	11.999	12.5117	23.2265	21.932	18.7375	22.4885	17.9933	17.3141	48.672	48.672	49.5006	51.9644	53.0234	53.0234
8	Female	Experimental	8.8	9.3	8.3	7.4	6.9	8.8	11.1	12	12.6	12.4	12.1	13.5	7.2	4.5	4.4	4.7	4.2	5.4	13.3	13.9	15.4	15.9	16.2	16.1	9.97833	10.7673	11.1233	11.5777	12.1057	12.8243	20.5437	21.3589	21.719	21.4314	21.2861	22.5569	48.672	46.285	44.573	44.573	53.0234	55.564
9	Female	Experimental	6.6	5	7	7.5	7.2	7.5	8.3	13	9	9.9	11.4	14.8	6.8	6	5.6	7.8	4.4	8.2	11.1	16	11.6	22	11.4	15	10.1567	10.8027	11.1457	11.7923	12.3387	12.9203	16.9682	19.697	17.7405	25.4217	17.7405	20.8438	46.285	47.0368	47.0368	47.9422	50.4828	51.6186
10	Female	Experimental	5.2	4.3	4	4.1	4.6	4.9	5.5	4.9	6.5	5.4	8.1	2.1	4.1	2.7	3.1	3.4	4.7	4.2	9.8	8.5	9	8.2	11.4	9.5	10.4797	11.05	11.455	12.568	13.3767	14.6283	14.525	12.3941	12.593	11.8922	15.452	13.9563	46.285	47.0368	49.5006	51.9644	50.4828	53.0234
11	Female	Experimental	10	8.7	7.6	7.2	8.2	8.6	11.5	10.2	9.3	6.9	6.9	5.2	13	9.4	6.5	7.4	6.9	7.1	13.8	12.7	11.5	11.2	9.3	8.9	10.9513	11.2683	11.4187	12.3553	13.112	14.385	21.7903	20.0085	18.1605	17.5707	16.7938	16.7938	46.285	51.059	58.22	56.892	58.812	55.564
12	Female	Experimental	9.4	9.8	10	7.2	8.3	7.6	9.9	7.6	7.1	5	5.8	6.4	12.8	11.6	10.1	5	6.6	7.3	19	17.3	15.7	2.2	4.8	4.2	10.6637	11.207	11.655	11.9513	12.465	13.5153	24.7867	23.9957	23.0946	8.85332	12.6921	11.3839	46.285	48.672	51.059	49.5006	48.7164	53.0234
13	Female	Experimental	7.5	6.6	6.1	9.2	9.3	8.5	9.4	8.2	7.7	6.4	6.1	5.2	6.6	5.4	4.7	5	5.2	4.8	11.9	10.7	10.5	9.8	8.8	8.1	10.5677	11.0827	11.753	12.3467	12.9143	13.435	18.4093	16.6182	15.9957	18.077	17.3141	15.9957	43.898	47.0368	54.4282	55.564	55.564	51.6186
14	Female	Experimental	9	8.6	8.3	7.3	7.6	7.5	7.6	10.2	14.7	10.3	9.2	8.3	7	6.4	5.7	4.4	4.4	7.4	13.1	13.3	13	13.2	16.9	14.9	10.417	10.791	11.0787	11.7533	12.2753	13.166	20.5437	20.3921	19.931	19.3018	22.2818	20.7691	48.672	49.5006	49.5006	50.4828	53.0234	53.0234
1	Female	Control	8.5	7.8	7.4	7.6	8.5	7.9	13.3	13.5	14	12.4	16.2	14.8	9.1	10.2	11.8	9.6	8.9	9.3	24	21.6	19.9	18.2	18.3	16.9	11.882	12.485	12.7983	13.3877	15.8267	16.4373	26.9938	25.3653	24.1202	23.1607	23.8069	22.4885	43.898	42.1092	42.1092	40.3204	40.3204	38.5316
2	Female	Control	5.6	7.2	8.1	8.2	8.4	9.5	8.8	11.4	13.4	17.3	18.8	11	5.7	5.2	4.6	5.9	7.1	8.8	11.2	11.1	10.6	12.8	13.4	13.6	9.96667	10.5817	11.1207	11.7967	12.4693	13.0523	16.1749	17.4854	17.825	19.697	20.3159	21.2861	39.124	37.1816	37.1816	37.1816	35.2392	35.2392
3	Female	Control	8.2	8.5	8.4	8.2	7.8	8.3	16.5	18.3	24	23.1	20.1	19.1	13.2	11.4	8.3	8.9	11.2	12.6	22.9	20.1	17.9	16.5	19.5	19.7	10.7543	11.3043	11.909	12.567	14.1657	15.7023	26.2893	24.9045	23.487	22.4198	24.1202	24.548	39.124	39.124	37.1816	37.1816	35.2392	35.2392
4	Female	Control	13.2	11.5	8.6	13.5	11.5	12.8	15	11.6	9.1	16.9	17.5	14.4	5.3	6.1	6.5	7.5	4.2	3.6	7.6	7.8	9.2	22.8	17.2	18.5	11.4437	12.1573	12.9093	13.7827	14.367	14.564	19.5397	18.3266	17.0551	29.5198	24.963	26.393	39.124	39.124	39.6454	39.6454	40.3204	40.3204
5	Female	Control	9.8	8.7	8.4	11.5	8.6	8.2	16	19.5	22.8	23.5	28.5	27	10	9.1	8.5	15.5	14.7	16.7	18.3	17.2	16.5	20.9	20.5	21	11.073	11.6973	12.0367	12.9823	13.5747	14.267	24.6081	23.2265	22.5569	26.9451	25.1945	25.2517	39.124	37.1816	37.1816	35.2392	35.2392	33.2968
6	Female	Control	14.6	16.9	18.1	13.6	11.1	12.6	22.4	24.1	25.1	26.7	16.8	11.8	11	12.9	15.4	11.2	12.2	13.3	21.2	14.9	15.6	24	23.5	19.2	11.592	12.568	13.5747	14.585	15.2257	16.1643	29.2468	26.6479	27.557	30.2296	27.9549	26.6479	39.124	39.124	39.124	39.6454	39.6454	37.7798
7	Female	Control	14.5	13	17.5	16.4	15.5	17.2	15.5	12.5	26.2	25.9	26.1	28.1	9.3	9.1	11.2	11.4	12.5	10.3	18	19	26	27.1	28.1	31.1	10.606	11.0383	11.4493	12.2233	12.8913	14.2107	26.9938	26.748	33.451	33.451	33.5056	36.0718	39.124	39.124	37.1816	37.1816	37.7798	37.7798
8	Female	Control	21.2	21.8	22.5	19.8	12.9	15.3	20.8	22.9	19	22	20.2	21.2	14.1	15.9	12	12.8	12.9	9.1	27.5	27	26.2	30.8	24.8	18.9	10.0817	11.4823	11.766	12.9753	13.1213	13.4443	36.2902	36.3448	36.2902	37.3276	30.2842	27.7807	39.124	37.1816	39.6454	37.7798	37.7798	35.9142
9	Female	Control	6.3	5.1	5.6	7.5	10.6	7.4	8.3	4.8	16.2	26.2	25.6	25.1	6.5	6.6	8	10.4	13.9	10.6	15.6	12.6	14.2	22.2	23.9	17.5	10.7627	11.3727	11.6227	12.5033	13.4527	14.947	20.3921	16.9682	18.7375	25.5338	27.9118	22.5569	43.898	43.898	42.1092	42.1092	42.861	42.861
10	Female	Control	5.3	4.9	4.7	6.9	7.2	7.9	8	8.6	8	6.9	12.2	11.3	5.4	5.7	5.3	5.5	8.1	8.9	11	11.1	11.2	11.2	14.6	14.2	10.2837	10.6863	11.103	11.9347	12.3677	13.1073	15.725	15.452	15.3605	17.3141	20.3159	20.5437	41.511	42.1092	42.1092	42.861	42.861	38.5316
11	Female	Control	8.8	7.2	17.3	15.6	17.4	16.2	9.7	9.9	19.5	25.5	17.2	18.4	5.2	4.8	9.2	9.6	10.7	11.2	14.1	13.2	22.5	23	24.4	22.9	9.862	10.45	11.185	11.9347	12.7033	13.495	21.1397	19.2219	31.4308	30.7756	32.5228	31.0486	39.124	39.124	37.1816	39.6454	37.7798	37.7798
12	Female	Control	7	13.5	19.3	18.1	16.9	15.4	6.9	7.8	11.9	11.4	14.9	15.9	7.4	7.3	6.6	7.6	9.2	9.1	15.1	13.9	17.5	13.1	16.5	16.7	10.2263	11.024	11.5063	12.248	12.7977	13.8217	20.5437	24.1821	29.7928	26.3413	27.4197	26.7977	39.124	37.1816	37.1816	37.7798	37.7798	35.9142
13	Female	Control	20.5	17.3	15	4.9	20.3	19.9	22.5	22.8	21.2	26	27.2	29.9	14.5	12.9	11.1	12.9	10.2	12.2	22.2	23.9	25.3	21.9	23	23.5	10.871	11.487	11.858	12.8777	14.2197	14.4723	33.0142	32.1952	31.7038	23.8069	33.3418	33.3964	39.124	37.1816	39.6454	37.7798	37.7798	35.9142
14	Female	Control	13.3	12.1	11.5	14.1	17.1	22.5	14	11.2	9	9.5	12.9	20.9	9.3	10	10.5	6.8	10.2	11.5	25.5	22.6	19.9	14	18	24.1	10.939	11.4627	11.784	12.336	13.1257	14.4037	30.8848	27.9978	26.4445	24.6081	28.8646	35.1436	41.511	41.511	41.511	42.1092	42.1092	40.3204
